# Supplementary material for: Recurrent Mutations in Cyclin D3 Confer Clinical Resistance to FLT3 Inhibitors in Acute Myeloid Leukemia
Source: Oxford University Press journal article supplement (doi:10.1158/1078-0432.ccr-20-3458), 2021-06-08
Supplement: 10780432ccr203458-sup-250715_2_supp_7097222_qslkk6.xlsx [file 10780432ccr203458-sup-250715_2_supp_7097222_qslkk6.xlsx]

## Sheet: Sheet1
Table S1. Patient Characteristics
Starting PLX3397 Dose	Subject ID	Age	Sex	Race	Responder or Non-Responder	Protocol-Defined Response	Type of AML	Cytogenetics at Enrollment
1400 mg	08_002	74	Female	White	Responder	CRi	De Novo	Normal
2000 mg	07_002	58	Male	White	Responder	PR	De Novo
3000 mg	07_008	38	Male	Black or African American	Responder	PR	De Novo
3000 mg	07_011	22	Male	Other: UNK	Responder	PR	De Novo	Normal
3000 mg	09_006	65	Female	White	Responder	CR	De Novo	Normal
3000 mg	01_004	74	Male	Asian	Non Responder		De Novo	Normal
3000 mg	01_006	72	Female	Black or African American	Non Responder		De Novo	Normal
3000 mg	01_015	59	Male	White	Non Responder		De Novo	Trisomy 6
3000 mg	01_020	62	Female	White	Non Responder		De Novo	46,XX,inv (16) (p13.1;q22) or t(16;16) (p13.1;q22)
3000 mg	03_006	73	Male	White	Non Responder		De Novo	46, XX, add(1), (q21), del(3), (p13p21), add(7)(q32), del(9)(p22)[cp7]/46,XX [23].
3000 mg	05_009	60	Male	White	Non Responder		De Novo
3000 mg	05_013	71	Male	Asian	Non Responder		De Novo	46,XY,t(11;21)(q23;q22)
3000 mg	05_015	39	Male	White	Non Responder		De Novo	46,XY,t(1;9)(q23;q34),t(6;10)(q15;q11.2),del(13)(q12q14)[9]/46,XY,t(1;4)(q23;p16)[2]/46,XY[9]
3000 mg	05_016	59	Female	White	Non Responder		De Novo	Normal
3000 mg	05_018	40	Male	White	Non Responder		De Novo	Normal
3000 mg	06_021	54	Female	White	Non Responder		Secondary to MDS	Normal
3000 mg	06_025	63	Male	Other: declined	Non Responder		Secondary to MDS
3000 mg	07_003	71	Female	White	Non Responder		De Novo
3000 mg	08_003	44	Female	White	Non Responder		De Novo	Normal
3000 mg	08_004	59	Male	White	Non Responder		De Novo	Normal
3000 mg	08_012	65	Female	White	Non Responder		De Novo	No Growth
3000 mg	08_013	82	Male	White	Non Responder		De Novo	46,XX,inv(12)(p13q13),t(16;22)(p11.2;q1?2)[19]/46,
3000 mg	08_014	66	Male	White	Non Responder		De Novo	46,XX,del(3)(q21),add(8)(q13)[1]/46,XX,add(11)(p13)[cp4]/46,XX,del(11)(p13)[cp3 ]/ 46,XX,t(12;12)(p13;q13)[3]/46,XX[cp9]
4000 mg	05_003	34	Male	Black or African American	Responder	PR	De Novo	Normal
4000 mg	09_005	58	Female	White	Responder	PR	Unknown	46,XX,der(1)(14qter?14q11.2::10q25?10q23::1p36.1?1qter),der(10)t(1;10)(p36.1 ;q23), der(14)(14pter?14q11.2::10q25?10qter){1} 46,XX,?inv(7)(q22q32){1} 46,XX,t(1;5)(p34;p13){1}
4000 mg	03_005	73	Female	White	Non Responder		De Novo	46,XY,t(6;11)
4000 mg	06_009	60	Female	Other: unknown	Non Responder		Unknown	Normal
4000 mg	08_007	49	Female	White	Non Responder		De Novo
5000 mg	07_004	64	Female	White	Responder	PR	De Novo
Non Responder = progressive disease, stable disease or not evaluable
Responder = complete response (CR) with incomplete hematologic recovery (CRi) or a partial response (PR)
